# Supplementary material for: Cigarette Smoke Condensate Exposure Induces Receptor for Advanced Glycation End-Products (RAGE)-Dependent Sterile Inflammation in Amniotic Epithelial Cells
Source: MDPI journal article supplement (doi:10.3390/ijms22158345), 2021-08-03
Supplement: s1 [file s1]

**Amniotic epithelial cells (48h)**

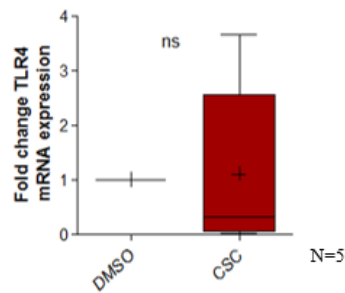

**Supplementary data S1:**

**CSC impact on TLR4 expression in amniotic epithelial cells**  
(Choltus *et al.* 2021)

TLR4 transcripts expression was measured in amniotic epithelial cells treated or not with CSC during 48h (N=5). Statistical analysis was performed thanks to a non-parametric t-test Mann-Whitney. ns means not significative.
